# Supplementary material
Source: Springer Nature journal article supplement (https://www.springermedizin.de/resource/supplementary/12913_2010_1631_MOESM1_ESM.pdf/9528600)

Count

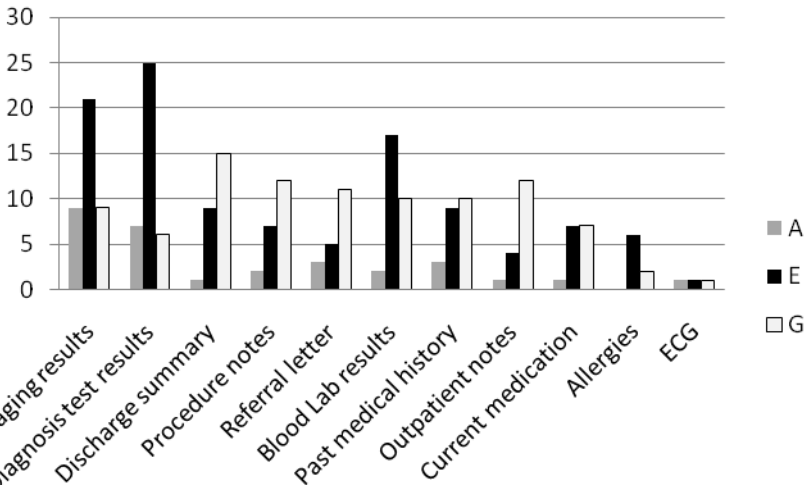

Supplement: MOESM1 [file 9528600]
